# Supplementary material for: Structural Insight into the Mechanism of σ32-Mediated Transcription Initiation of Bacterial RNA Polymerase
Source: MDPI journal article supplement (doi:10.3390/biom13050738), 2023-04-25
Supplement: s1 [file s1]

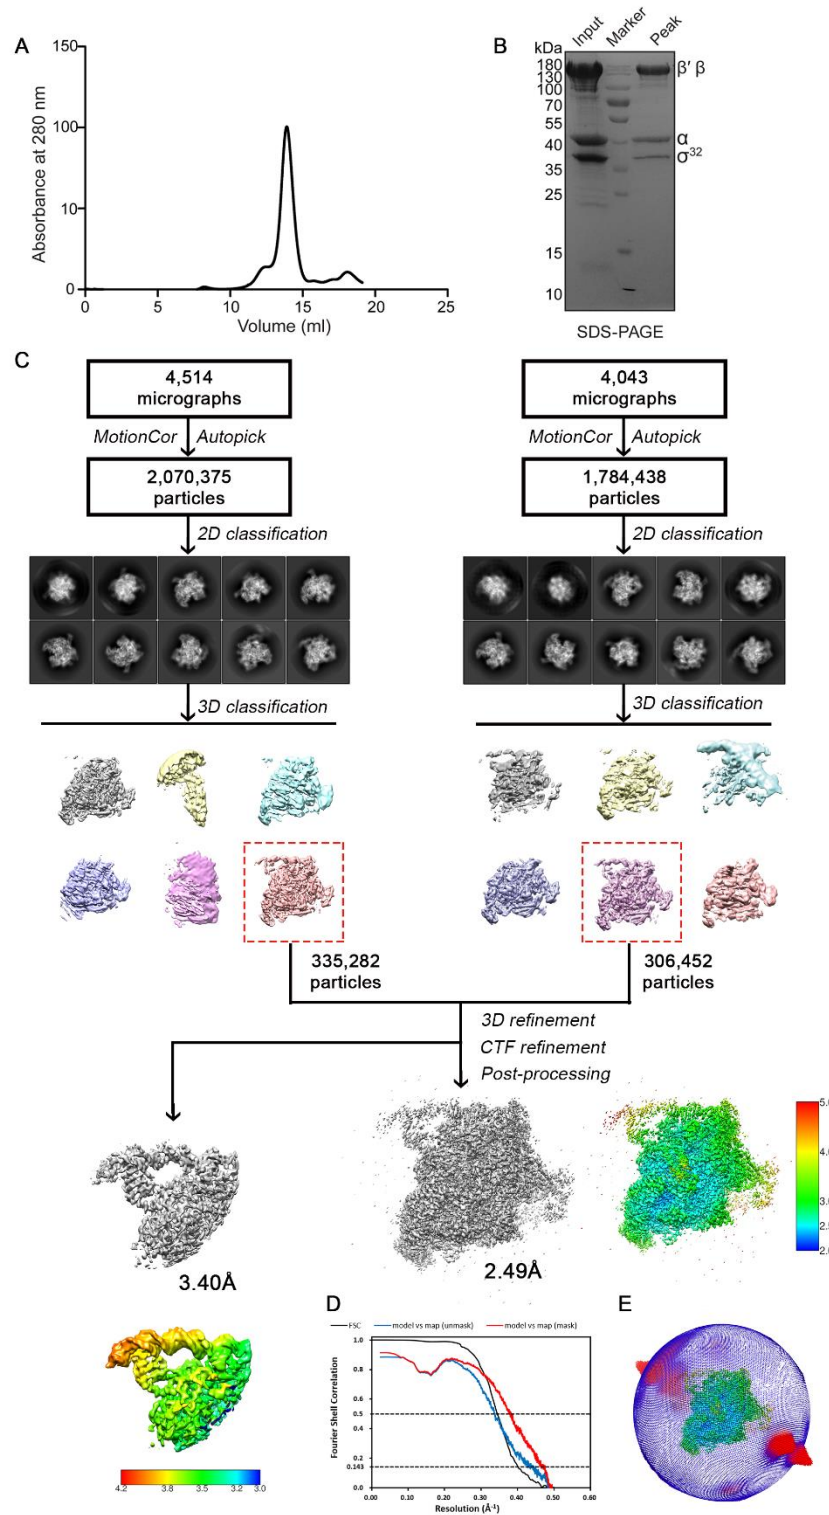

**Figure S1.** Purification of *E. coli*  $\sigma^{32}$ -RPo complex and Cryo-EM of the *E. coli*  $\sigma^{32}$ -RPo complex. (A) Chromatogram map of gel filtration. (B) SDS-PAGE of the purified complex. (C) Pipeline of the cryo-EM data processing. (D) The Fourier shell correlation (FSC) analysis. The dotted line represents the 0.143 FSC cut off. The final resolution is determined at 2.49 Å. (E) The angular distributions of *E. coli*  $\sigma^{32}$ -RPo particle and Density map for *E. coli*  $\sigma^{32}$ -RPo, colored by local resolution.

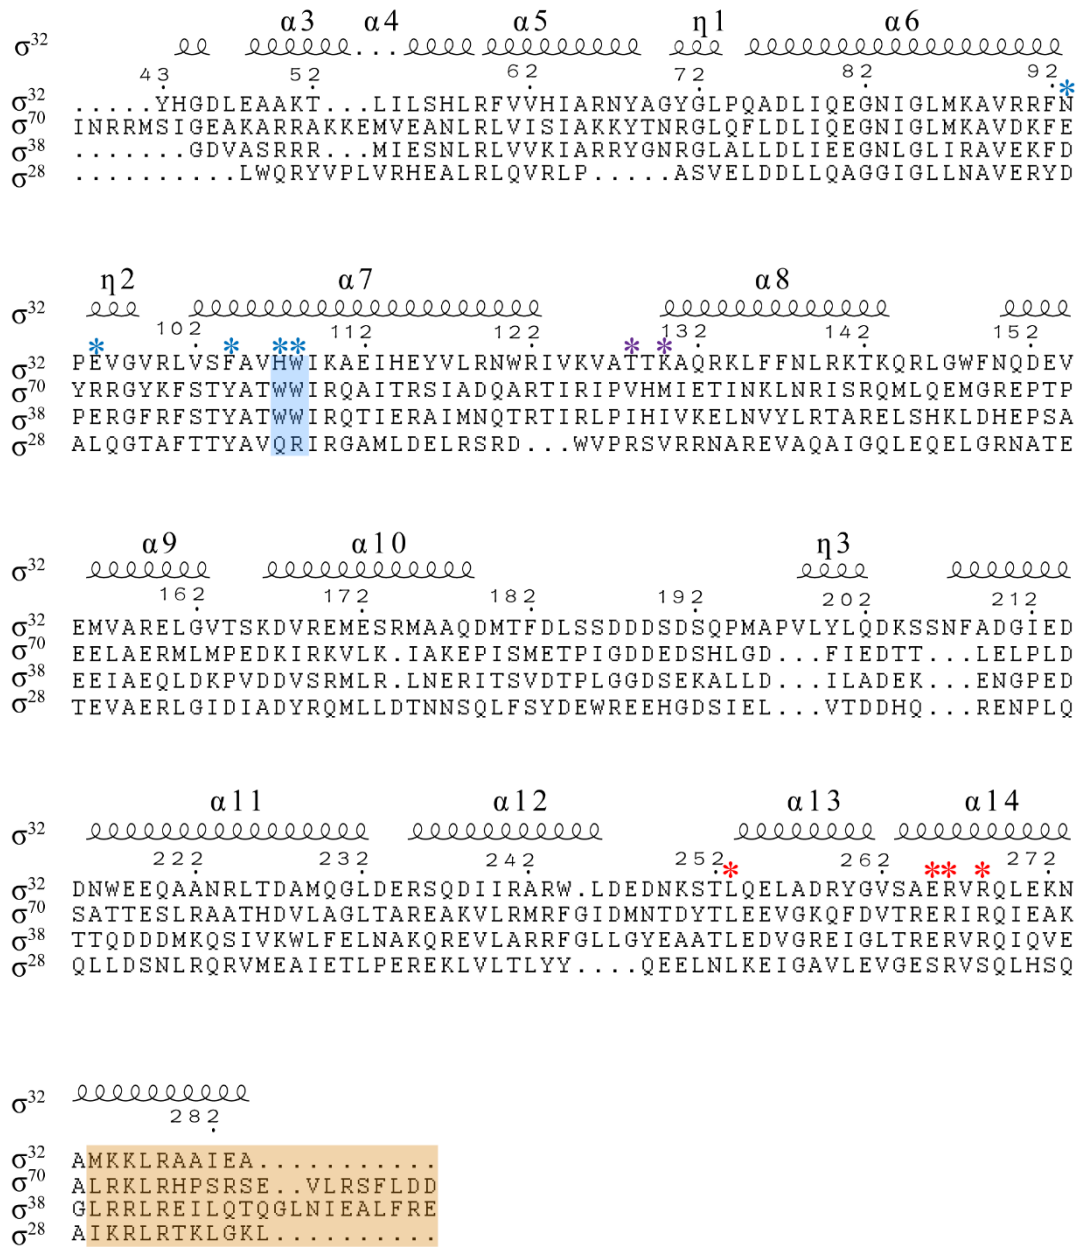

**Figure S2.** Sequence alignment of  $\sigma$  factors. Sequence alignment analysis between  $\sigma^{32}$ ,  $\sigma^{70}$ ,  $\sigma^{38}$ ,  $\sigma^{28}$ . The experimentally validated residues in  $\sigma_4$ ,  $\sigma_3$ , and  $\sigma_2$  are indicated with red, purple and blue stars, respectively. The promoter unwinding residues in  $\sigma_2$  are shown in light blue frame. The replaced region in the  $\sigma_4$  tail of  $\sigma^{38}$ ,  $\sigma^{28}$  is shown in light brown frame, consistent with diagrams in Figure 3E.

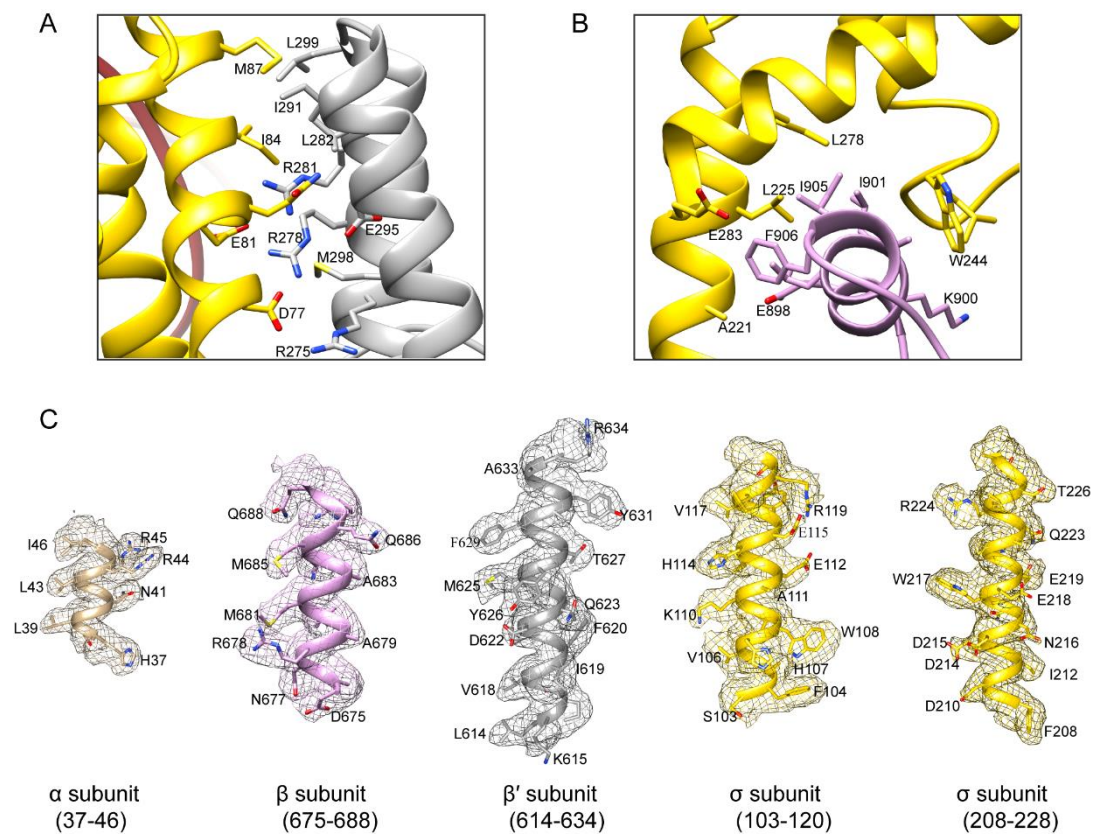

**Figure S3.** Structural and interacted details of pointed motifs. (A) The interaction details between  $\sigma_2$  and  $\beta'$  clamp helix. (B) The interaction details between  $\sigma_4$  and  $\beta_{FTH}$ . (C) The structural details in  $\alpha$ ,  $\beta$ ,  $\beta'$ , and  $\sigma^{32}$  motifs.

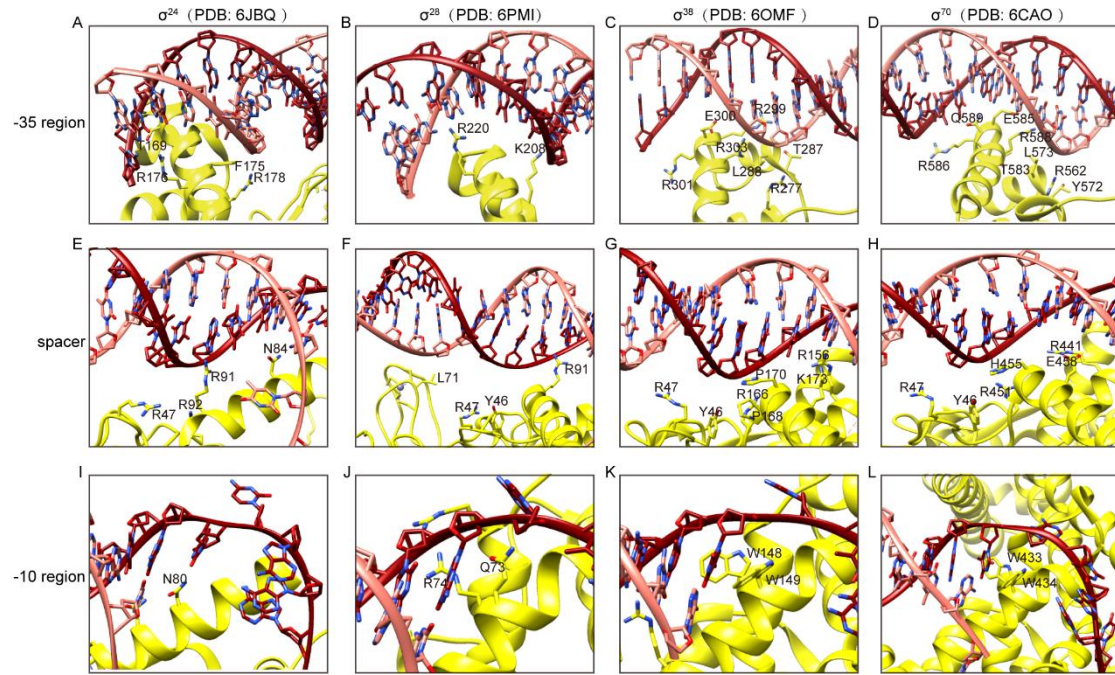

**Figure S4.** The detailed interactions between  $\sigma$  ( $\sigma^{24}$ ,  $\sigma^{28}$ ,  $\sigma^{38}$  and  $\sigma^{70}$ ) and corresponding promoters. (A-D) The interaction details between  $\sigma_4$  ( $\sigma^{24}$ ,  $\sigma^{28}$ ,  $\sigma^{38}$  and  $\sigma^{70}$ ) and corresponding -35 elements. (E-H) The interaction details between  $\sigma_3$  ( $\sigma^{24}$ ,  $\sigma^{28}$ ,  $\sigma^{38}$  and  $\sigma^{70}$ ) and corresponding spacer regions. (I-L) The wedge residues in different  $\sigma$  ( $\sigma^{24}$ ,  $\sigma^{28}$ ,  $\sigma^{38}$  and  $\sigma^{70}$ ).

**Table S1.** Kinetic parameters from Figure. 2C of RPo formation by *E. coli* RNAP holoenzyme comprising wild-type or derivatives of *E. coli*  $\sigma^{32}$ .

| Samples                              | $a_1$       | $k_{obs,1}$ (s <sup>-1</sup> ) | $a_2$       | $k_{obs,2}$ (s <sup>-1</sup> ) |
|--------------------------------------|-------------|--------------------------------|-------------|--------------------------------|
| <i>Ec</i> holo $\sigma^{32}$ (WT)    | 1.719±0.008 | 0.1102±0.0007                  | 2.819±0.003 | 0.0107±0.0004                  |
| <i>Ec</i> holo $\sigma^{32}$ (V97A)  | 1.532±0.006 | 0.0362±0.0009                  | 2.596±0.003 | 0.0069±0.0003                  |
| <i>Ec</i> holo $\sigma^{32}$ (N94A)  | 1.446±0.007 | 0.0911±0.0005                  | 2.361±0.002 | 0.0104±0.0006                  |
| <i>Ec</i> holo $\sigma^{32}$ (H107A) | 1.179±0.006 | 0.0242±0.0015                  | 2.426±0.002 | 0.0063±0.0005                  |
| <i>Ec</i> holo $\sigma^{32}$ (F104A) | 0.969±0.005 | 0.0244±0.0018                  | 2.077±0.002 | 0.0061±0.0002                  |
| <i>Ec</i> holo $\sigma^{32}$ (W108A) | 0.895±0.004 | 0.0599±0.0011                  | 1.556±0.001 | 0.0079±0.0002                  |
| <i>Ec</i> core                       | 0.155±0.058 | 0.0136±0.0038                  | 0.289±0.001 | 0.0047±0.0003                  |

**Table S2.** Kinetic parameters from Figure. 2D of RPo formation by *E. coli*

| Samples                           | $a_1$       | $k_{obs,1}$ (s <sup>-1</sup> ) | $a_2$       | $k_{obs,2}$ (s <sup>-1</sup> ) |
|-----------------------------------|-------------|--------------------------------|-------------|--------------------------------|
| <i>Ec</i> holo $\sigma^{32}$ (WT) | 1.770±0.010 | 0.1199±0.0033                  | 2.773±0.003 | 0.0144±0.0007                  |
| <i>Ec</i> holo $\sigma^{32}$ (WW) | 1.819±0.009 | 0.1424±0.0022                  | 3.019±0.003 | 0.0122±0.0006                  |
| <i>Ec</i> holo $\sigma^{32}$ (QR) | 1.122±0.006 | 0.0899±0.0006                  | 1.675±0.002 | 0.0079±0.0005                  |
| <i>Ec</i> core                    | 0.156±0.002 | 0.0148±0.0002                  | 0.289±0.001 | 0.0015±0.0003                  |

RNAP holoenzyme comprising wild-type or derivatives of *E. coli*  $\sigma^{32}$ .
